# Supplementary material for: Dietary Habits and Nutrient Deficiencies in a Cohort of European Crohn’s Disease Adult Patients
Source: MDPI journal article supplement (doi:10.3390/ijms24021494), 2023-01-12
Supplement: s1 [file s1]

**Name & surname:** \_\_\_\_\_

ID subject: \_\_\_\_\_

Date: \_\_\_\_\_

**Day of the week:** \_\_\_\_\_

## DAY 1

**Before breakfast:**

| <u>TIMES</u> | <u>PLACE</u> | <u>DESCRIPTION OF BEVERAGES / FOODS AND TYPE OF PREPARATION</u> | <u>QUANTITY</u> |
|--------------|--------------|-----------------------------------------------------------------|-----------------|
|              |              |                                                                 |                 |
|              |              |                                                                 |                 |
|              |              |                                                                 |                 |
|              |              |                                                                 |                 |
|              |              |                                                                 |                 |

**Breakfast:**

[illegible]

**Name & surname:** \_\_\_\_\_

**ID subject:** \_\_\_\_\_

**Date:** \_\_\_\_\_

**Day of the week:** \_\_\_\_\_

## DAY 1

**Morning Snack:**

| <u>TIMES</u> | <u>PLACE</u> | <u>DESCRIPTION OF BEVERAGES / FOODS AND TYPE OF PREPARATION</u> | <u>QUANTITY</u> |
|--------------|--------------|-----------------------------------------------------------------|-----------------|
|              |              |                                                                 |                 |
|              |              |                                                                 |                 |
|              |              |                                                                 |                 |
|              |              |                                                                 |                 |
|              |              |                                                                 |                 |

**Lunch:**

[illegible]

**Name & surname:** \_\_\_\_\_

**ID subject:** \_\_\_\_\_

**Date:** \_\_\_\_\_

**Day of the week:** \_\_\_\_\_

## DAY 1

**Afternoon snack:**

| <u>TIMES</u> | <u>PLACE</u> | <u>DESCRIPTION OF BEVERAGES / FOODS AND TYPE OF PREPARATION</u> | <u>QUANTITY</u> |
|--------------|--------------|-----------------------------------------------------------------|-----------------|
|              |              |                                                                 |                 |
|              |              |                                                                 |                 |
|              |              |                                                                 |                 |
|              |              |                                                                 |                 |
|              |              |                                                                 |                 |

**Dinner:**

[illegible]

Name & surname: \_\_\_\_\_

ID subject: \_\_\_\_\_

Date: \_\_\_\_\_

Day of the week: \_\_\_\_\_

**DAY 1**

**After dinner:**

| <u>TIMES</u> | <u>PLACE</u> | <u>DESCRIPTION OF BEVERAGES / FOODS AND TYPE OF PREPARATION</u> | <u>QUANTITY</u> |
|--------------|--------------|-----------------------------------------------------------------|-----------------|
|              |              |                                                                 |                 |
|              |              |                                                                 |                 |
|              |              |                                                                 |                 |
|              |              |                                                                 |                 |
|              |              |                                                                 |                 |

**During the night:**

| <u>TIMES</u> | <u>PLACE</u> | <u>DESCRIPTION OF BEVERAGES / FOODS AND TYPE OF PREPARATION</u> | <u>QUANTITY</u> |
|--------------|--------------|-----------------------------------------------------------------|-----------------|
|              |              |                                                                 |                 |
|              |              |                                                                 |                 |
|              |              |                                                                 |                 |
|              |              |                                                                 |                 |

**Comments (e.g. recipes)**

---

---

---

---

---

---

---

**Name & surname:** \_\_\_\_\_

ID subject: \_\_\_\_\_

Date: \_\_\_\_\_

**Day of the week:** \_\_\_\_\_

## DAY 2

**Before breakfast:**

| <u>TIMES</u> | <u>PLACE</u> | <u>DESCRIPTION OF BEVERAGES / FOODS AND TYPE OF PREPARATION</u> | <u>QUANTITY</u> |
|--------------|--------------|-----------------------------------------------------------------|-----------------|
|              |              |                                                                 |                 |
|              |              |                                                                 |                 |
|              |              |                                                                 |                 |
|              |              |                                                                 |                 |
|              |              |                                                                 |                 |

**Breakfast:**

[illegible]

**Name & surname:** \_\_\_\_\_

**ID subject:** \_\_\_\_\_

**Date:** \_\_\_\_\_

**Day of the week:** \_\_\_\_\_

## DAY 2

**Morning Snack:**

| <u>TIMES</u> | <u>PLACE</u> | <u>DESCRIPTION OF BEVERAGES / FOODS AND TYPE OF PREPARATION</u> | <u>QUANTITY</u> |
|--------------|--------------|-----------------------------------------------------------------|-----------------|
|              |              |                                                                 |                 |
|              |              |                                                                 |                 |
|              |              |                                                                 |                 |
|              |              |                                                                 |                 |
|              |              |                                                                 |                 |

**Lunch:**

[illegible]

**Name & surname:** \_\_\_\_\_

**ID subject:** \_\_\_\_\_

Date: \_\_\_\_\_

**Day of the week:** \_\_\_\_\_

## DAY 2

**Afternoon snack:**

| <u>TIMES</u> | <u>PLACE</u> | <u>DESCRIPTION OF BEVERAGES / FOODS AND TYPE OF PREPARATION</u> | <u>QUANTITY</u> |
|--------------|--------------|-----------------------------------------------------------------|-----------------|
|              |              |                                                                 |                 |
|              |              |                                                                 |                 |
|              |              |                                                                 |                 |
|              |              |                                                                 |                 |
|              |              |                                                                 |                 |

**Dinner:**

[illegible]

Name & surname: \_\_\_\_\_

ID subject: \_\_\_\_\_

Date: \_\_\_\_\_

Day of the week: \_\_\_\_\_

**DAY 2**

**After dinner:**

| <u>TIMES</u> | <u>PLACE</u> | <u>DESCRIPTION OF BEVERAGES / FOODS AND TYPE OF PREPARATION</u> | <u>QUANTITY</u> |
|--------------|--------------|-----------------------------------------------------------------|-----------------|
|              |              |                                                                 |                 |
|              |              |                                                                 |                 |
|              |              |                                                                 |                 |
|              |              |                                                                 |                 |
|              |              |                                                                 |                 |

**During the night:**

| <u>TIMES</u> | <u>PLACE</u> | <u>DESCRIPTION OF BEVERAGES / FOODS AND TYPE OF PREPARATION</u> | <u>QUANTITY</u> |
|--------------|--------------|-----------------------------------------------------------------|-----------------|
|              |              |                                                                 |                 |
|              |              |                                                                 |                 |
|              |              |                                                                 |                 |
|              |              |                                                                 |                 |

**Comments (e.g. recipes)**

---

---

---

---

---



**Name & surname:** \_\_\_\_\_

**ID subject:** \_\_\_\_\_

Date: \_\_\_\_\_

**Day of the week:** \_\_\_\_\_

### DAY 3

**Before breakfast:**

| <u>TIMES</u> | <u>PLACE</u> | <u>DESCRIPTION OF BEVERAGES / FOODS AND TYPE OF PREPARATION</u> | <u>QUANTITY</u> |
|--------------|--------------|-----------------------------------------------------------------|-----------------|
|              |              |                                                                 |                 |
|              |              |                                                                 |                 |
|              |              |                                                                 |                 |
|              |              |                                                                 |                 |
|              |              |                                                                 |                 |

**Breakfast:**

[illegible]

**Name & surname:** \_\_\_\_\_

**ID subject:** \_\_\_\_\_

Date: \_\_\_\_\_

**Day of the week:** \_\_\_\_\_

### DAY 3

**Morning Snack:**

| <u>TIMES</u> | <u>PLACE</u> | <u>DESCRIPTION OF BEVERAGES / FOODS AND TYPE OF PREPARATION</u> | <u>QUANTITY</u> |
|--------------|--------------|-----------------------------------------------------------------|-----------------|
|              |              |                                                                 |                 |
|              |              |                                                                 |                 |
|              |              |                                                                 |                 |
|              |              |                                                                 |                 |
|              |              |                                                                 |                 |

**Lunch:**

[illegible]

**Name & surname:** \_\_\_\_\_

**ID subject:** \_\_\_\_\_

**Date:** \_\_\_\_\_

**Day of the week:** \_\_\_\_\_

### DAY 3

**Afternoon snack:**

| <u>TIMES</u> | <u>PLACE</u> | <u>DESCRIPTION OF BEVERAGES / FOODS AND TYPE OF PREPARATION</u> | <u>QUANTITY</u> |
|--------------|--------------|-----------------------------------------------------------------|-----------------|
|              |              |                                                                 |                 |
|              |              |                                                                 |                 |
|              |              |                                                                 |                 |
|              |              |                                                                 |                 |
|              |              |                                                                 |                 |

**Dinner:**

[illegible]

Name & surname: \_\_\_\_\_

ID subject: \_\_\_\_\_

Date: \_\_\_\_\_

Day of the week: \_\_\_\_\_

**DAY 3**

**After dinner:**

| <u>TIMES</u> | <u>PLACE</u> | <u>DESCRIPTION OF BEVERAGES / FOODS AND TYPE OF PREPARATION</u> | <u>QUANTITY</u> |
|--------------|--------------|-----------------------------------------------------------------|-----------------|
|              |              |                                                                 |                 |
|              |              |                                                                 |                 |
|              |              |                                                                 |                 |
|              |              |                                                                 |                 |
|              |              |                                                                 |                 |

**During the night:**

| <u>TIMES</u> | <u>PLACE</u> | <u>DESCRIPTION OF BEVERAGES / FOODS AND TYPE OF PREPARATION</u> | <u>QUANTITY</u> |
|--------------|--------------|-----------------------------------------------------------------|-----------------|
|              |              |                                                                 |                 |
|              |              |                                                                 |                 |
|              |              |                                                                 |                 |
|              |              |                                                                 |                 |

**Comments (e.g. recipes)**

---

---

---

---

---

---

---

**Name & surname:** \_\_\_\_\_

**ID subject:** \_\_\_\_\_

Date: \_\_\_\_\_

**Day of the week:** \_\_\_\_\_

## DAY 4

**Before breakfast:**

| <u>TIMES</u> | <u>PLACE</u> | <u>DESCRIPTION OF BEVERAGES / FOODS AND TYPE OF PREPARATION</u> | <u>QUANTITY</u> |
|--------------|--------------|-----------------------------------------------------------------|-----------------|
|              |              |                                                                 |                 |
|              |              |                                                                 |                 |
|              |              |                                                                 |                 |
|              |              |                                                                 |                 |
|              |              |                                                                 |                 |

**Breakfast:**

[illegible]

**Name & surname:** \_\_\_\_\_

**ID subject:** \_\_\_\_\_

**Date:** \_\_\_\_\_

**Day of the week:** \_\_\_\_\_

## DAY 4

**Morning Snack:**

| <u>TIMES</u> | <u>PLACE</u> | <u>DESCRIPTION OF BEVERAGES / FOODS AND TYPE OF PREPARATION</u> | <u>QUANTITY</u> |
|--------------|--------------|-----------------------------------------------------------------|-----------------|
|              |              |                                                                 |                 |
|              |              |                                                                 |                 |
|              |              |                                                                 |                 |
|              |              |                                                                 |                 |
|              |              |                                                                 |                 |

**Lunch:**

[illegible]

**Name & surname:** \_\_\_\_\_

**ID subject:** \_\_\_\_\_

Date: \_\_\_\_\_

**Day of the week:** \_\_\_\_\_

## DAY 4

**Afternoon snack:**

| <u>TIMES</u> | <u>PLACE</u> | <u>DESCRIPTION OF BEVERAGES / FOODS AND TYPE OF PREPARATION</u> | <u>QUANTITY</u> |
|--------------|--------------|-----------------------------------------------------------------|-----------------|
|              |              |                                                                 |                 |
|              |              |                                                                 |                 |
|              |              |                                                                 |                 |
|              |              |                                                                 |                 |
|              |              |                                                                 |                 |

**Dinner:**

[illegible]

Name & surname: \_\_\_\_\_

ID subject: \_\_\_\_\_

Date: \_\_\_\_\_

Day of the week: \_\_\_\_\_

**DAY 4**

**After dinner:**

| <u>TIMES</u> | <u>PLACE</u> | <u>DESCRIPTION OF BEVERAGES / FOODS AND TYPE OF PREPARATION</u> | <u>QUANTITY</u> |
|--------------|--------------|-----------------------------------------------------------------|-----------------|
|              |              |                                                                 |                 |
|              |              |                                                                 |                 |
|              |              |                                                                 |                 |
|              |              |                                                                 |                 |
|              |              |                                                                 |                 |

**During the night:**

| <u>TIMES</u> | <u>PLACE</u> | <u>DESCRIPTION OF BEVERAGES / FOODS AND TYPE OF PREPARATION</u> | <u>QUANTITY</u> |
|--------------|--------------|-----------------------------------------------------------------|-----------------|
|              |              |                                                                 |                 |
|              |              |                                                                 |                 |
|              |              |                                                                 |                 |
|              |              |                                                                 |                 |

**Comments (e.g. recipes)**

---

---

---

---

---

---

---



**Name & surname:** \_\_\_\_\_

**ID subject:** \_\_\_\_\_

Date: \_\_\_\_\_

**Day of the week:** \_\_\_\_\_

## DAY 5

**Before breakfast:**

| <u>TIMES</u> | <u>PLACE</u> | <u>DESCRIPTION OF BEVERAGES / FOODS AND TYPE OF PREPARATION</u> | <u>QUANTITY</u> |
|--------------|--------------|-----------------------------------------------------------------|-----------------|
|              |              |                                                                 |                 |
|              |              |                                                                 |                 |
|              |              |                                                                 |                 |
|              |              |                                                                 |                 |
|              |              |                                                                 |                 |

**Breakfast:**

[illegible]

**Name & surname:** \_\_\_\_\_

**ID subject:** \_\_\_\_\_

**Date:** \_\_\_\_\_

**Day of the week:** \_\_\_\_\_

## DAY 5

**Morning Snack:**

| <u>TIMES</u> | <u>PLACE</u> | <u>DESCRIPTION OF BEVERAGES / FOODS AND TYPE OF PREPARATION</u> | <u>QUANTITY</u> |
|--------------|--------------|-----------------------------------------------------------------|-----------------|
|              |              |                                                                 |                 |
|              |              |                                                                 |                 |
|              |              |                                                                 |                 |
|              |              |                                                                 |                 |
|              |              |                                                                 |                 |

**Lunch:**

[illegible]

**Name & surname:** \_\_\_\_\_

**ID subject:** \_\_\_\_\_

Date: \_\_\_\_\_

**Day of the week:** \_\_\_\_\_

## DAY 5

**Afternoon snack:**

| <u>TIMES</u> | <u>PLACE</u> | <u>DESCRIPTION OF BEVERAGES / FOODS AND TYPE OF PREPARATION</u> | <u>QUANTITY</u> |
|--------------|--------------|-----------------------------------------------------------------|-----------------|
|              |              |                                                                 |                 |
|              |              |                                                                 |                 |
|              |              |                                                                 |                 |
|              |              |                                                                 |                 |
|              |              |                                                                 |                 |

**Dinner:**

[illegible]

Name & surname: \_\_\_\_\_

ID subject: \_\_\_\_\_

Date: \_\_\_\_\_

Day of the week: \_\_\_\_\_

**DAY 5**

**After dinner:**

| <u>TIMES</u> | <u>PLACE</u> | <u>DESCRIPTION OF BEVERAGES / FOODS AND TYPE OF PREPARATION</u> | <u>QUANTITY</u> |
|--------------|--------------|-----------------------------------------------------------------|-----------------|
|              |              |                                                                 |                 |
|              |              |                                                                 |                 |
|              |              |                                                                 |                 |
|              |              |                                                                 |                 |
|              |              |                                                                 |                 |

**During the night:**

| <u>TIMES</u> | <u>PLACE</u> | <u>DESCRIPTION OF BEVERAGES / FOODS AND TYPE OF PREPARATION</u> | <u>QUANTITY</u> |
|--------------|--------------|-----------------------------------------------------------------|-----------------|
|              |              |                                                                 |                 |
|              |              |                                                                 |                 |
|              |              |                                                                 |                 |
|              |              |                                                                 |                 |

**Comments (e.g. recipes)**

---

---

---

---

---

**Name & surname:** \_\_\_\_\_

**ID subject:** \_\_\_\_\_

Date: \_\_\_\_\_

**Day of the week:** \_\_\_\_\_

## DAY 6

**Before breakfast:**

| <u>TIMES</u> | <u>PLACE</u> | <u>DESCRIPTION OF BEVERAGES / FOODS AND TYPE OF PREPARATION</u> | <u>QUANTITY</u> |
|--------------|--------------|-----------------------------------------------------------------|-----------------|
|              |              |                                                                 |                 |
|              |              |                                                                 |                 |
|              |              |                                                                 |                 |
|              |              |                                                                 |                 |
|              |              |                                                                 |                 |

**Breakfast:**

[illegible]

**Name & surname:** \_\_\_\_\_

**ID subject:** \_\_\_\_\_

Date: \_\_\_\_\_

**Day of the week:** \_\_\_\_\_

## DAY 6

**Morning Snack:**

| <u>TIMES</u> | <u>PLACE</u> | <u>DESCRIPTION OF BEVERAGES / FOODS AND TYPE OF PREPARATION</u> | <u>QUANTITY</u> |
|--------------|--------------|-----------------------------------------------------------------|-----------------|
|              |              |                                                                 |                 |
|              |              |                                                                 |                 |
|              |              |                                                                 |                 |
|              |              |                                                                 |                 |
|              |              |                                                                 |                 |

**Lunch:**

[illegible]

**Name & surname:** \_\_\_\_\_

**ID subject:** \_\_\_\_\_

Date: \_\_\_\_\_

**Day of the week:** \_\_\_\_\_

## DAY 6

**Afternoon snack:**

| <u>TIMES</u> | <u>PLACE</u> | <u>DESCRIPTION OF BEVERAGES / FOODS AND TYPE OF PREPARATION</u> | <u>QUANTITY</u> |
|--------------|--------------|-----------------------------------------------------------------|-----------------|
|              |              |                                                                 |                 |
|              |              |                                                                 |                 |
|              |              |                                                                 |                 |
|              |              |                                                                 |                 |
|              |              |                                                                 |                 |

**Dinner:**

[illegible]

Name & surname: \_\_\_\_\_

ID subject: \_\_\_\_\_

Date: \_\_\_\_\_

Day of the week: \_\_\_\_\_

**DAY 6**

**After dinner:**

| <u>TIMES</u> | <u>PLACE</u> | <u>DESCRIPTION OF BEVERAGES / FOODS AND TYPE OF PREPARATION</u> | <u>QUANTITY</u> |
|--------------|--------------|-----------------------------------------------------------------|-----------------|
|              |              |                                                                 |                 |
|              |              |                                                                 |                 |
|              |              |                                                                 |                 |
|              |              |                                                                 |                 |
|              |              |                                                                 |                 |

**During the night:**

| <u>TIMES</u> | <u>PLACE</u> | <u>DESCRIPTION OF BEVERAGES / FOODS AND TYPE OF PREPARATION</u> | <u>QUANTITY</u> |
|--------------|--------------|-----------------------------------------------------------------|-----------------|
|              |              |                                                                 |                 |
|              |              |                                                                 |                 |
|              |              |                                                                 |                 |
|              |              |                                                                 |                 |

**Comments (e.g. recipes)**

---

---

---

---

---

---

---



**Name & surname:** \_\_\_\_\_

**ID subject:** \_\_\_\_\_

Date: \_\_\_\_\_

**Day of the week:** \_\_\_\_\_

## DAY 7

**Before breakfast:**

| <u>TIMES</u> | <u>PLACE</u> | <u>DESCRIPTION OF BEVERAGES / FOODS AND TYPE OF PREPARATION</u> | <u>QUANTITY</u> |
|--------------|--------------|-----------------------------------------------------------------|-----------------|
|              |              |                                                                 |                 |
|              |              |                                                                 |                 |
|              |              |                                                                 |                 |
|              |              |                                                                 |                 |
|              |              |                                                                 |                 |

**Breakfast:**

[illegible]





Name & surname: \_\_\_\_\_

ID subject: \_\_\_\_\_

Date: \_\_\_\_\_

Day of the week: \_\_\_\_\_

**DAY 7**

**After dinner:**

| <u>TIMES</u> | <u>PLACE</u> | <u>DESCRIPTION OF BEVERAGES / FOODS AND TYPE OF PREPARATION</u> | <u>QUANTITY</u> |
|--------------|--------------|-----------------------------------------------------------------|-----------------|
|              |              |                                                                 |                 |
|              |              |                                                                 |                 |
|              |              |                                                                 |                 |
|              |              |                                                                 |                 |
|              |              |                                                                 |                 |

**During the night:**

| <u>TIMES</u> | <u>PLACE</u> | <u>DESCRIPTION OF BEVERAGES / FOODS AND TYPE OF PREPARATION</u> | <u>QUANTITY</u> |
|--------------|--------------|-----------------------------------------------------------------|-----------------|
|              |              |                                                                 |                 |
|              |              |                                                                 |                 |
|              |              |                                                                 |                 |
|              |              |                                                                 |                 |

**Comments (e.g. recipes)**

---

---

---

---

---
